# Supplementary material for: Tobacco Smoke Exposure According to Location of Home Smoking in Israel: Findings from the Project Zero Exposure Study
Source: MDPI journal article supplement (doi:10.3390/ijerph20043523), 2023-02-16
Supplement: s1 [file s1]

**Supplemental Table S1:** Tobacco smoke exposure of children (yes/no, as assessed by hair nicotine) by socioeconomic and other variables (N=141, children with sufficient hair for analysis only)

|                      |                          | Percent Unexposed<br>(<LOD) |      | Percent Exposed<br>(>LOD) |       | Total |      | p-value |
|----------------------|--------------------------|-----------------------------|------|---------------------------|-------|-------|------|---------|
|                      |                          | n                           | %    | n                         | %     | n     | %    |         |
| Location             | Garden/Yard/Out of house | 12                          | 28.6 | 30                        | 71.4  | 42    | 29.8 | 0.38    |
|                      | Balcony only             | 21                          | 38.2 | 34                        | 61.8  | 55    | 39.0 |         |
|                      | Designated indoor area   | 11                          | 26.8 | 30                        | 73.2  | 41    | 29.1 |         |
|                      | Whole house              | 0                           | 0.0  | 3                         | 100.0 | 3     | 2.1  |         |
| Child sex            | Female                   | 24                          | 32.0 | 51                        | 68.0  | 75    | 53.2 | 0.83    |
|                      | Male                     | 20                          | 30.3 | 46                        | 69.7  | 66    | 46.8 |         |
| Smoking parent       | Mother only              | 8                           | 36.4 | 14                        | 63.6  | 22    | 15.6 | 0.84    |
|                      | Father only              | 16                          | 29.6 | 38                        | 70.4  | 54    | 38.3 |         |
|                      | Both mother and father   | 20                          | 30.8 | 45                        | 69.2  | 65    | 46.1 |         |
| Parents' nationality | Both Israeli born        | 30                          | 31.9 | 64                        | 68.1  | 94    | 66.7 | 0.80    |
|                      | Other                    | 14                          | 29.8 | 33                        | 70.2  | 47    | 33.3 |         |

|                          |                       |    |      |    |      |    |      |       |
|--------------------------|-----------------------|----|------|----|------|----|------|-------|
| Monthly household income | Lower/Average         | 23 | 30.7 | 52 | 69.3 | 75 | 55.2 | 0.79  |
|                          | Above average         | 20 | 32.8 | 41 | 67.2 | 61 | 44.8 |       |
| Father's education       | Not academic          | 13 | 18.1 | 59 | 81.9 | 72 | 53.3 | 0.001 |
|                          | Academic <sup>a</sup> | 29 | 46.0 | 34 | 54.0 | 63 | 46.7 |       |
| Mother's education       | Not academic          | 12 | 26.7 | 33 | 73.3 | 45 | 32.4 | 0.45  |
|                          | Academic <sup>a</sup> | 31 | 33.0 | 63 | 67.0 | 94 | 67.6 |       |

<sup>a</sup>Academic: With at least some University education, versus without any University education

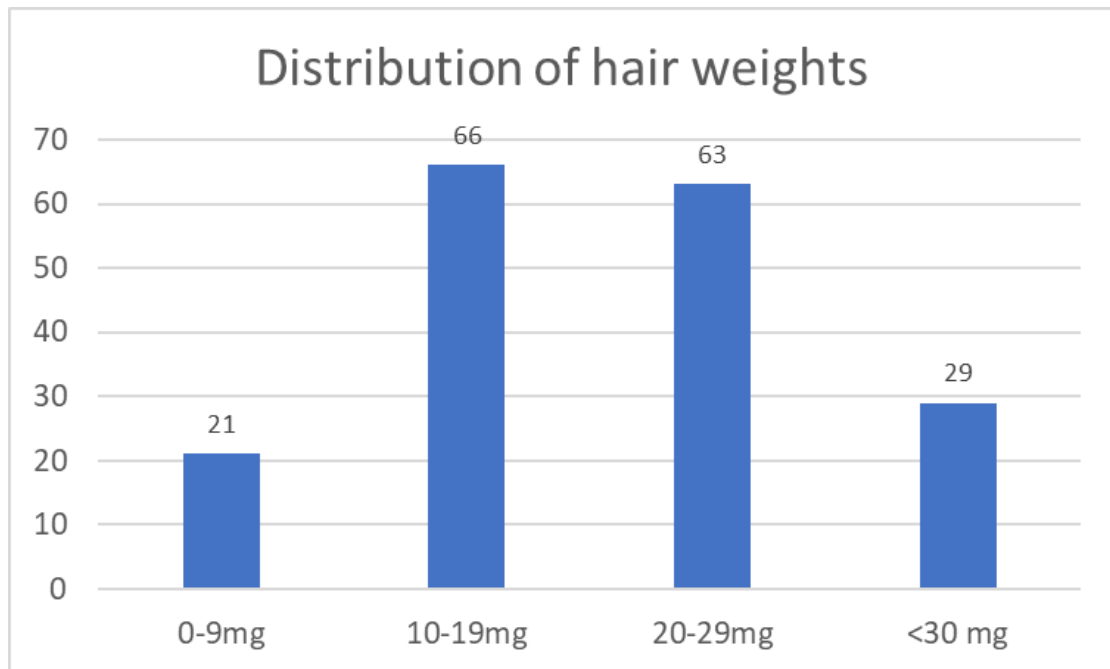

**Supplemental Figure S1:** Histogram of hair mass of participants in Studies 1 and 2.

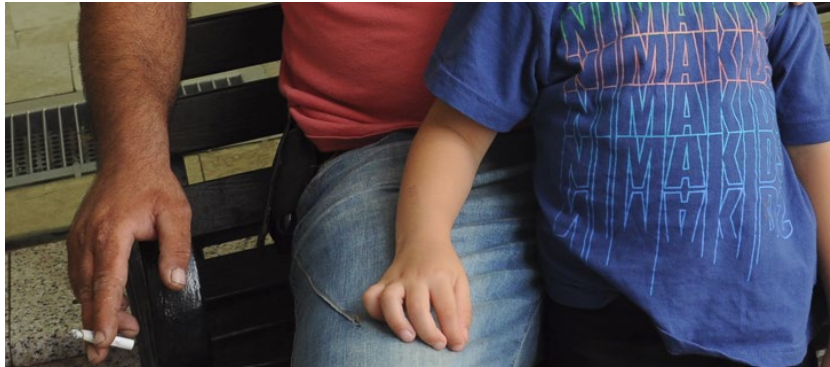

**Supplemental Figure S2:** Father smoking next to child. Jerusalem, outdoors.

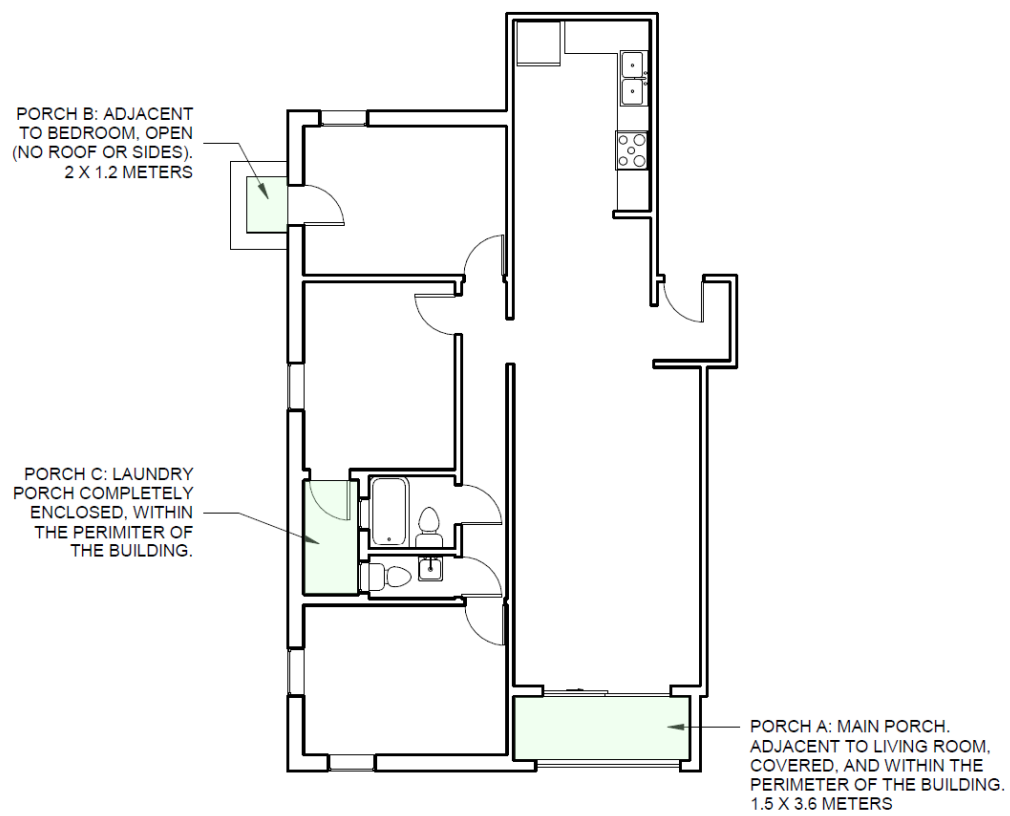

**Supplemental Figure S3:** Floor plan for an apartment with porches.

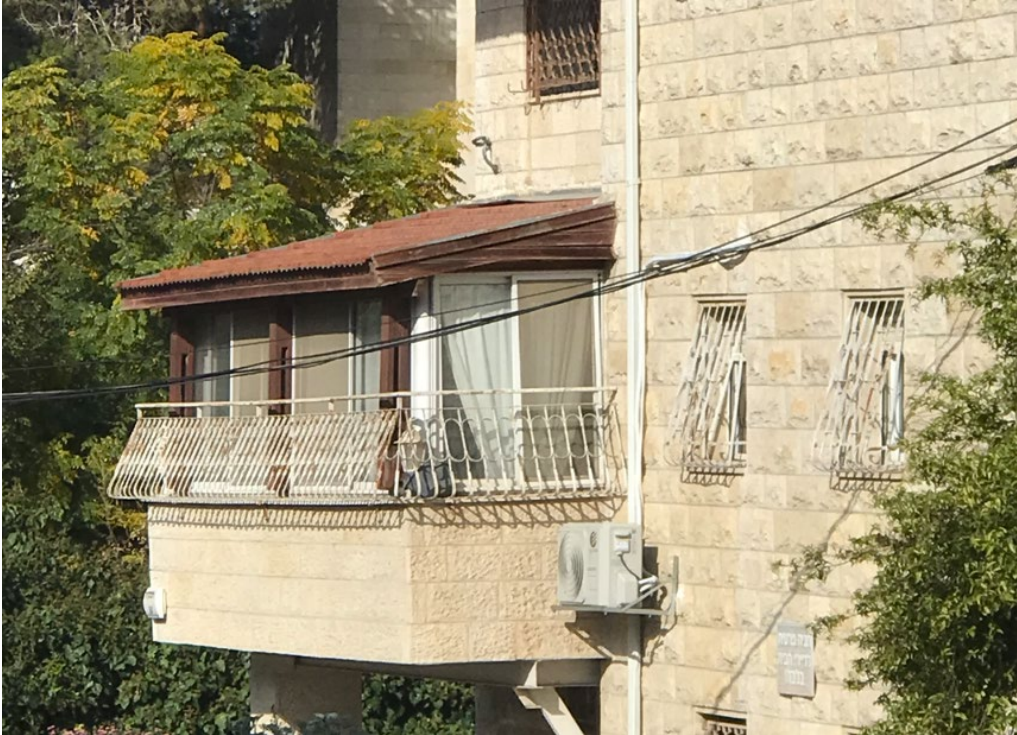

A

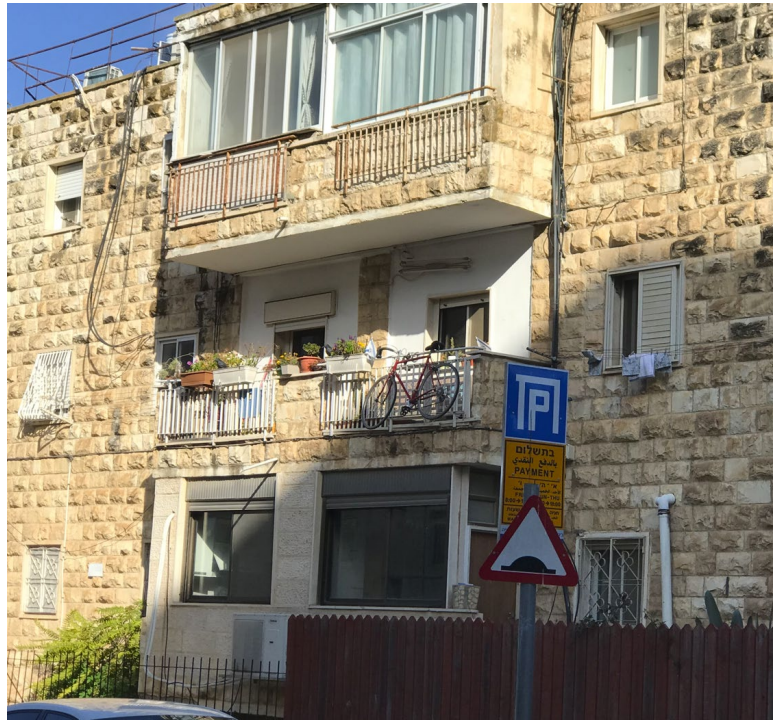

B

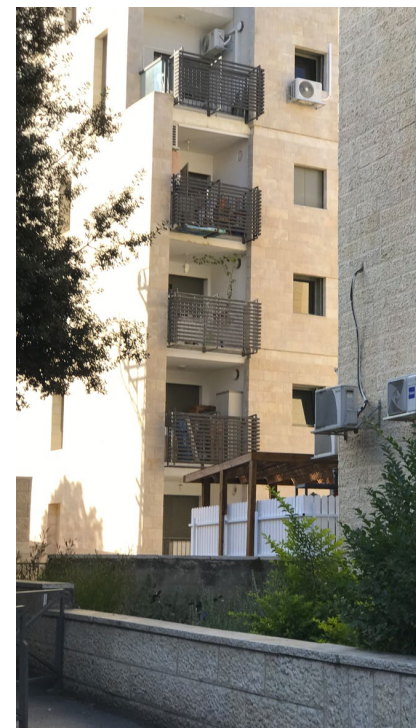

C

**Supplemental Figure S4:** Photos of typical porches in Jerusalem. From left to right: A. Porch outdoors, adjacent to the building, and completely enclosed. B. Top and bottom apartments have completely enclosed porches, while the middle apartments have covered, semi-enclosed porch. C. Porches stacked one on top of each other, all adjacent to the apartments, all except top apartment completely covered, all partially enclosed, all partially within the building perimeter, all small.
